# Supplementary material for: Expansion of the known distribution of Asiatic mouflon (Ovis orientalis) in the Late Pleistocene of the Southern Levant
Source: R Soc Open Sci. 2017 Aug 23;4(8):170409. doi: 10.1098/rsos.170409 (PMC5579105; doi:10.1098/rsos.170409)
Supplement: Number of identified specimens according to element for gazelle and caprines [file rsos170409supp3.xlsx]

## Sheet: Sheet1
	NISP
	Early Natufian		Late Natufian		Shubayqa 6
Element	Gazelle	Sheep/goat	Gazelle	Sheep/goat	Gazelle	Sheep/goat
Horncore	52	0	14	2	2	0
Mandible	154	1	65	3	5	1
Atlas	19	0	6	0	0	0
Axis	25	0	6	1	2	0
Scapula	82	1	60	1	4	0
Humerus	118	2	60	0	3	0
Radius	174	1	161	4	12	0
Ulna	97	2	58	2	0	1
Radial carpal	26	0	77	6	6	0
Ulnar carpal	30	1	73	9	8	0
Intermediate carpal	46	1	68	6	1	0
Carpal 2+3	36	1	90	4	7	0
Carpal 4	23	1	63	9	9	0
Accessory carpal	8	0	7	1	2	0
Pelvis	120	0	38	7	5	2
Femur	67	1	22	3	3	0
Patella	66	1	38	3	5	0
Tibia	215	1	129	10	17	0
Os malleolus	125	1	89	6	7	0
Calcaneus	34	1	52	10	7	1
Astragalus	57	6	109	8	14	0
Tarsal 1	3	1	0	3	2	0
Tarsal 2+3	31	1	43	0	6	0
Tarsal central+4	28	1	51	6	9	0
Metapodial	376	10	722	68	41	2
Phalanx 1	280	23	739	143	51	9
Phalanx 2	189	19	635	129	37	5
Phalanx 3	136	11	374	35	25	5
Total	2617	88	3849	479	290	26
